# Supplementary material for: Mineral Intake and Status of Cow's Milk Allergic Infants Consuming an Amino Acid-based Formula
Source: PubMed Central journal article supplement (PMC5559186; doi:10.1097/mpg.0000000000001655), 2017-08-22
Supplement: jpga-65-346-s004.pdf [file jpga-65-346-s004.pdf]

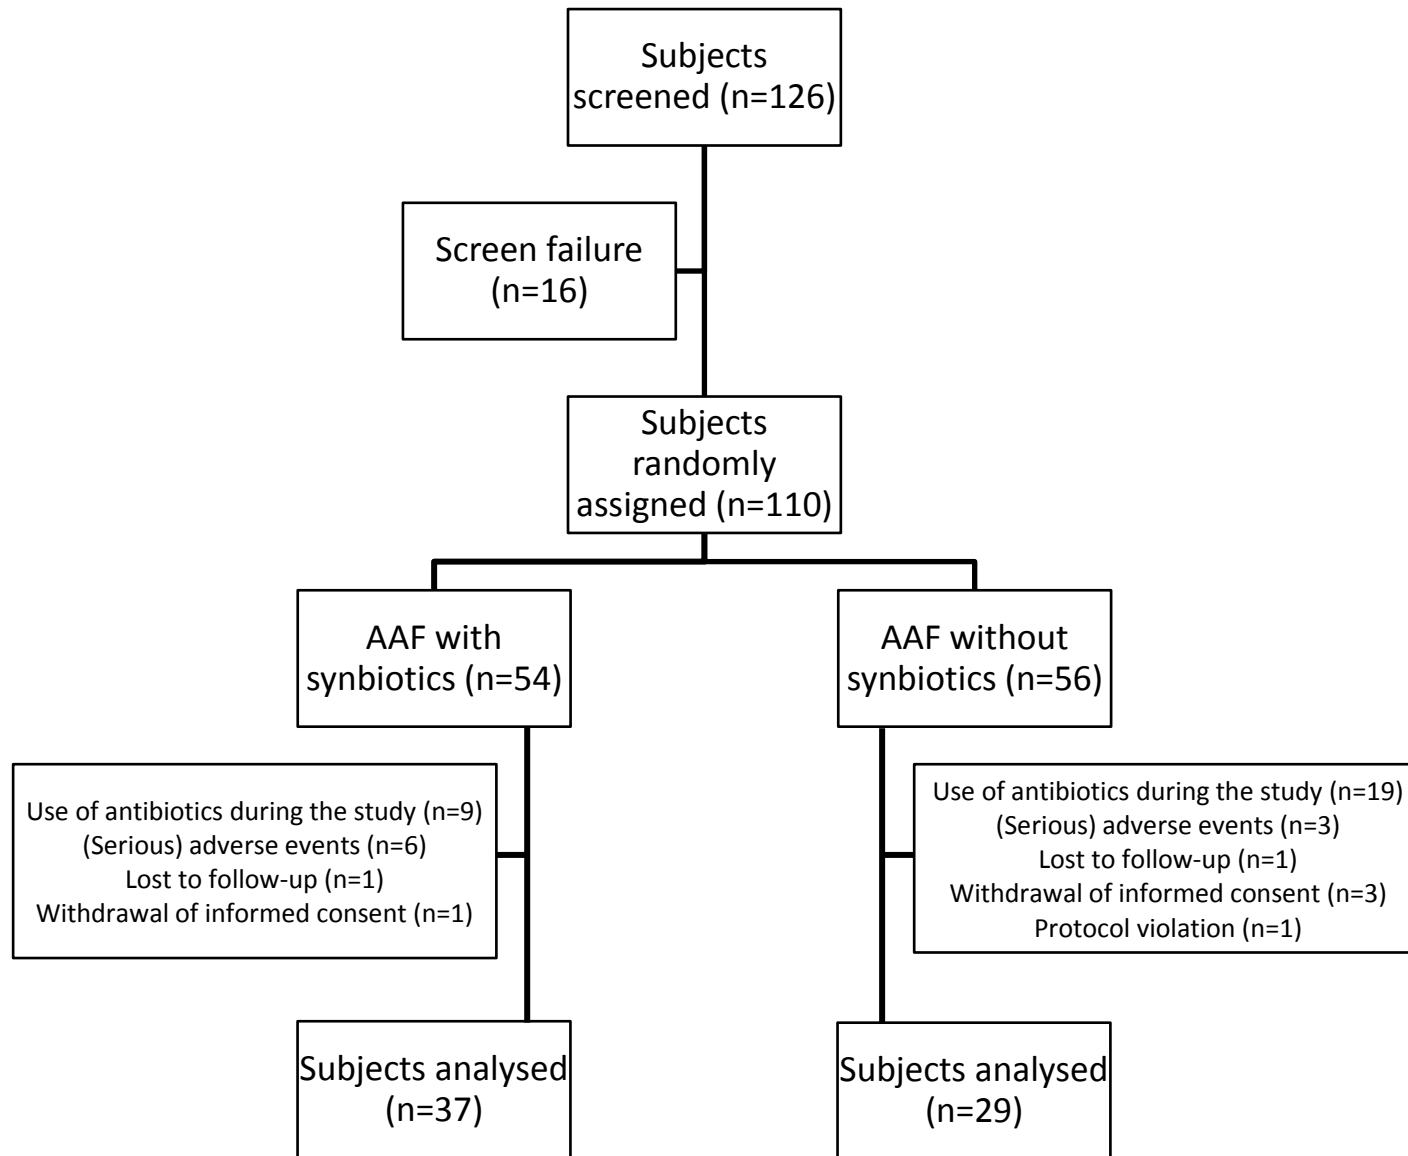

**Supplemental Figure 1.** Study flow chart. AAF: amino acid-based formula
